# Supplementary material for: Improvement of Arterial Stiffness One Month after Bariatric Surgery and Potential Mechanisms
Source: J Clin Med. 2021 Feb 10;10(4):691. doi: 10.3390/jcm10040691 (PMC7916665; doi:10.3390/jcm10040691)
Supplement: Supplementary file 1 [file jcm-10-00691-s001.pdf]

# SUPPLEMENTARY MATERIALS

**Supplementary Table S1.** Changes in anthropometric, blood pressure and arterial stiffness parameters one-month after bariatric surgery according to the type of surgery.

| Roux-en-Y gastric Bypass<br>(n = 27)            |                       |                      |        | Sleeve Gastrectomy<br>(n = 20) |                      |        | p Between<br>Groups |
|-------------------------------------------------|-----------------------|----------------------|--------|--------------------------------|----------------------|--------|---------------------|
| Parameter                                       | Baseline<br>Mean ± SD | 1 month<br>Mean ± SD | p      | Baseline<br>Mean ± SD          | 1 month<br>Mean ± SD | p      |                     |
| Anthropometric parameters                       |                       |                      |        |                                |                      |        |                     |
| Body weight, kg                                 | 117.4±15.8            | 104.2± 13.6          | <0.001 | 119.1± 24.1                    | 105.0±15.2           | <0.001 | 0.448               |
| Waist circumference,<br>cm                      | 130.9 ± 8.2           | 122.9 ± 7.1          | <0.001 | 132.4 ± 13.7                   | 121.7 ± 13.6         | <0.001 | 0.106               |
| Arterial stiffness                              |                       |                      |        |                                |                      |        |                     |
| 24h-PP, mmHg                                    | 45.1 ± 6.5            | 42.7 ± 7.3           | 0.047  | 49.8 ± 7.7                     | 46.2 ± 6.5           | 0.006  | 0.434               |
| 24h-PWV, m/s                                    | 6.31 ± 1.0            | 6.06 ± 0.92          | 0.011  | 6.76 ± 1.04                    | 6.49 ± 1.02          | <0.001 | 0.818               |
| AIx@75, %                                       | 25.1± 6.1             | 21.7 ± 7.0           | 0.004  | 26.8 ± 8.9                     | 24.0 ± 7.3           | 0.052  | 0.723               |
| Blood pressure and other hemodynamic parameters |                       |                      |        |                                |                      |        |                     |
| 24h-SBP, mmHg                                   | 119.0 ± 11.3          | 113.5 ± 11.1         | 0.005  | 122.8±13.6                     | 115.5 ± 8.2          | <0.001 | 0.455               |
| 24h-DBP, mmHg                                   | 73.9 ± 9.1            | 70.7 ± 8.5           | 0.006  | 73.1 ± 7.8                     | 69.4 ± 3.9           | 0.009  | 0.759               |
| 24h-HR, bpm                                     | 73.1 ± 7.7            | 66.9 ± 7.6           | <0.001 | 73.4 ± 9.2                     | 66.6 ± 8.2           | <0.001 | 0.491               |
| Cardiac output                                  | 4.6 ± 0.6             | 4.5 ± 0.5            | 0.057  | 4.7 ± 0.6                      | 4.5 ± 0.5            | 0.001  | 0.637               |

AIx@75 = augmentation index at 75 beats/minute; DBP = diastolic blood pressure; HR = heart rate; PP = pulse pressure; PWV = pulse-wave velocity; SBP = systolic blood pressure.

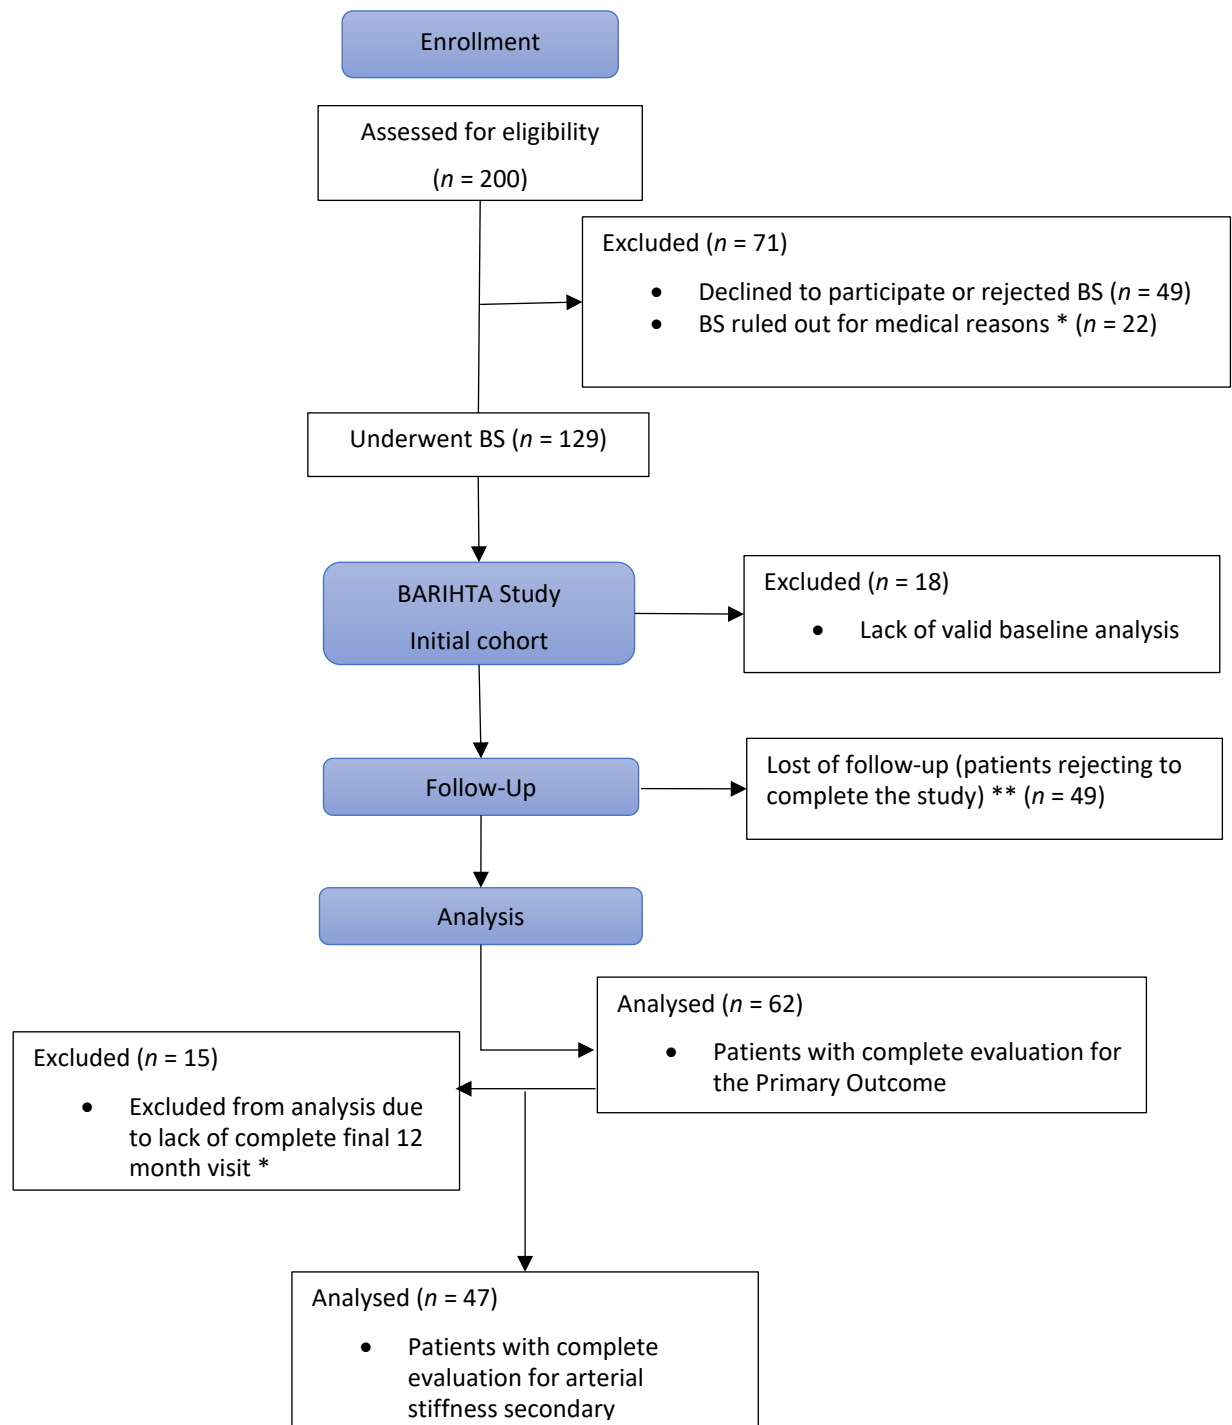

**Supplementary Figure S1.** Flowchart for participants in the BARIHTA Study. BS = Bariatric surgery. \* None of them was excluded because of heart failure or other cardiac disease. \*\* Most patients rejected to complete the study because of complains about wearing the 24h-Mobile-O-Graph device or due to work reasons (having achieved work reinsertion after losing weight)

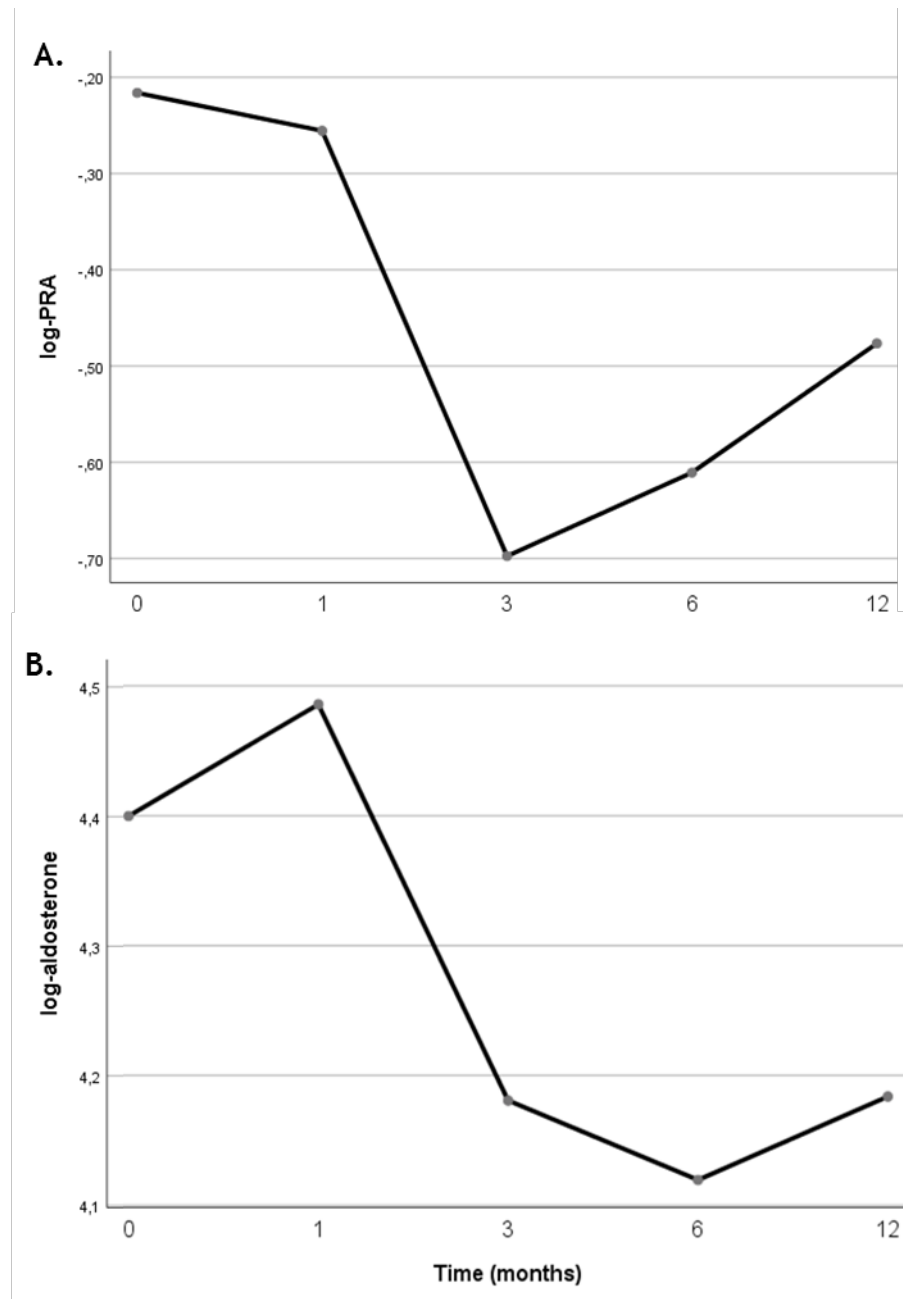

**Supplementary Figure S2. (A)** Variation of plasma renin activity (log-transformed) levels at follow-up. **(B)** Variation of plasma aldosterone (log-transformed) concentration at follow-up. **log** = log-transformed; **PRA** = plasma renin activity
